# Supplementary material for: Synthesis of branched PEG brushes hybrid hydrophilic magnetic nanoparticles for the selective enrichment of N-linked glycopeptides
Source: Royal Society of Chemistry journal article supplement (doi:10.1039/c2cc33600f), 2012-01-01
Supplement: c2cc33600f.pdf [file c2cc33600f.pdf]

# Synthesis of branched PEG brushes hybrid hydrophilic magnetic nanoparticles for the selective enrichment of N-linked glycopeptides

Zhichao Xiong,<sup>‡<sup>a,b</sup></sup> Liang Zhao,<sup>‡<sup>a</sup></sup> Fangjun Wang,<sup>a</sup> Jun Zhu,<sup>a</sup> Hongqiang Qin,<sup>a</sup> Ren'an Wu,<sup>a</sup> Weibing Zhang,<sup>\*<sup>a,b</sup></sup> and Hanfa Zou<sup>\*<sup>a</sup></sup>

## Experiment details

### Chemicals and reagents

Tetraethoxysilane (TEOS), 3-aminopropyltrimethoxysilane (APTAMOS), human serum immunoglobulin G (human IgG), horseradish peroxidase (HRP), human alpha-acid glycoprotein (human AGP), 2,2'-bipyridyl, copper (I) chloride, 2-bromoisobutyryl bromide, poly (ethylene glycol) methacrylate (PEG, Mn:~ 360), trypsin, elastase, chymotrypsin, Gluc and 2, 5-dihydroxybenzoic acid (2, 5-DHB) were purchased from sigma-Aldrich (St, Louis, MO, USA). Peptide-N-glycosidase (PNGase F) was obtained from New England Biolabs (Ipswich, MA, USA). Centrifugal filter with MWCO of 3 KDa was purchased from Millipore (Bedford, MA). Urea, tris, dithiothreitol (DTT), and iodoacetamide (IAA) were purchased from BioRad (Hercules, CA, USA). Human plasma was obtained from a healthy donor. Acetonitrile (ACN), formic acid (FA) and trifluoroacetic acid (TFA) were purchased from Merck (Darmstadt, Germany). Iron (III) chloride hexahydrate (FeCl<sub>3</sub>·6H<sub>2</sub>O), ammonium solution (25 wt %), sodium acetate anhydrous, triethylamine, isopropanol, dichloromethane and methanol were obtained from Tianjin Kermel plant of chemical reagent (Tianjin, China). Pure water was prepared with a Milli-Q system (Millipore, Bedford, MA, USA). All other chemical and reagents were of analytical grade and were obtained from Shanghai Chemical Reagent.

### Synthesis of hybrid Fe<sub>3</sub>O<sub>4</sub>@SiO<sub>2</sub>@PEG-Maltose MNPs

Synthesis route of Fe<sub>3</sub>O<sub>4</sub>@SiO<sub>2</sub>@PEG-Maltose MNPs was shown in **Scheme 1A**.

The Fe<sub>3</sub>O<sub>4</sub> MNPs were synthesized according to a literature procedure. The Fe<sub>3</sub>O<sub>4</sub> MNPs (350 mg) were washed twice with ethanol and re-dispersed in ethanol (160 mL) with 0.5 h sonication. After the addition of ammonia (25%, 1.0 mL), water (20.0 mL), and TEOS (1.0 mL), the mixed solution was stirred for 6 h at room temperature. With the using of a magnet, the Fe<sub>3</sub>O<sub>4</sub>@SiO<sub>2</sub> core-shell MNPs were rinsed with ethanol (50 mL) for three times and resuspended in isopropanol (60 mL), in which APTAMOS (1.0 mL) was dropwise added, and the reaction solution was mechanically stirred for 24 h. Then, the amine-modified Fe<sub>3</sub>O<sub>4</sub>@SiO<sub>2</sub> MNPs were isolated, washed with 50 mL isopropanol and 50 mL dichloromethane for three times, respectively, and redispersed

in 50 ml anhydrous dichloromethane. After the addition of distilled triethylamine (0.711 mL, 5.0 mmol), the whole solution was put in an ice bath under argon atmosphere and cooled to 0 °C. 2-bromoisobutyryl bromide (0.528 mL, 4.2 mmol) was added to the above solution, leaving mechanically stirred for 2.0 h at 0 °C and then at room temperature for 16 h. The synthesized MNPs (denoted as Fe<sub>3</sub>O<sub>4</sub>@SiO<sub>2</sub>-Br) were isolated and washed with dichloromethane, ethanol and water for three times, respectively, finally dried in the vacuum oven overnight at 50 °C.

ATRP was carried out following a reported method. Fe<sub>3</sub>O<sub>4</sub>@SiO<sub>2</sub>-Br (150 mg), poly (ethylene glycol) methacrylate (PEG) (3.26 mL), methanol (5.39 mL) and water (1.34 mL) were added to a Schlenk tube equipped with a mechanical stir bar. The mixed solution was submerged into an ice-salt bath, followed three times of pump-refill cycles. At the third cycle, the flask was filled with argon. CuCl (99.5 mg, 1 mmol), CuBr<sub>2</sub> (11.1 mg, 0.05 mmol) and 2,2'-dipyridyl (312 mg, 2 mmol) were quickly added to the Schlenk tube. After two additional pump-refill cycles, the solution were stirred for 12 h at 25 °C. The obtained materials (designed as Fe<sub>3</sub>O<sub>4</sub>@SiO<sub>2</sub>@PEG) were thoroughly washed with water, methanol and acetonitrile.

In a dried flask under nitrogen, the obtained Fe<sub>3</sub>O<sub>4</sub>@SiO<sub>2</sub>@PEG MNPs (50 mg) were dispersed in 30 mL dry tetrahydrofuran with sonication for 30 min; triethylamine (1.4 mL) and methylsulfonylchloride (324 μL, 4.2 mmol) were added and stirred over night. The chlorine-modified MNPs were obtained after washed three times with tetrahydrofuran and N,N-dimethylformamide, respectively. Subsequently, stirring 50 mg chlorine-modified MNPs in 30 mL N,N-dimethylformamide solution containing sodium azide (203 mg, 3.12 mmol) and ammonium chloride (167 mg, 3.12 mmol) for 26 h at 50 °C. The obtained materials (designed as Fe<sub>3</sub>O<sub>4</sub>@SiO<sub>2</sub>@PEG-N<sub>3</sub>) were isolated, thoroughly washed with N,N-dimethylformamide, water, and methanol, and dried in the vacuum oven overnight at 50 °C.

1-Propargyl-O-maltose was synthesized as following a reported method. In a dried flask under nitrogen atmosphere, acetyl maltose (10.0 g) was dissolved in 150 mL dichloromethane; propargylalcohol (1.0 mL) was added. The result solution was stirred and cooled to 0 °C, boron trifluoride/ether (3.0 mL) was added dropwise. The reaction was stirred for 1 h and at room temperature for 4 h. potassium carbonate (5.0 g) was added and the solution continuously stirred for 30 min. The unreacted solid was filtered out and the filtrate was concentrated, 1-Propargyl-acetyl maltose (7.55 g, 76% yield) was obtained with *m/z* at 697.2 by MALDI-TOF MS. The obtained solid (1.0 g) was dissolved in 50 mL dry methanol solution, and a freshly prepared sodium

methoxide in methanol (12 mL, 1 mol/L) was slowly added dropwise. Monitoring of the reaction by MALDI-TOF MS indicated complete disappearance of 1-Propargyl-acetyl maltose. The reaction was quenched by neutralization with Amberlite IR-120 resin (H<sup>+</sup> form), the solid was filtered out and concentrated to get oily solid. The crude product was directly used for conjugation to MNPs without further purifications. 1-Propargyl-O-maltose was confirmed with by MALDI-TOF MS (m/z at 402.8 [M<sup>+</sup>]).

In a dried flask under nitrogen, Fe<sub>3</sub>O<sub>4</sub>@SiO<sub>2</sub>@PEG-N<sub>3</sub> MNPs (100 mg) were suspended in 4 mL methanol/ water (v/v=1:1) and sonicated for 20 min, 30 μL of freshly prepared solution containing sodium ascorbate and copper sulfate (mmol/mmol=100: 200), and 1-propargyl-O-maltose (10 mg) were added. The mixture was shaken powerful over night. The obtained MNPs (designed as Fe<sub>3</sub>O<sub>4</sub>@SiO<sub>2</sub>@PEG-Maltose) were isolated, washed six times with ethanol and pure water, and dried at 40 °C for 24 h.

The synthesis route of Fe<sub>3</sub>O<sub>4</sub>@SiO<sub>2</sub>-Maltose MNPs was shown in **Scheme 1B**. The experiment procedure is similar to **Scheme 1A**.

### Characterization

Scanning electron microscope (SEM) image was carried out by JSM-6360 LV scanning electron microscope (Jeol, Mitaka, Japan). Transmission electron microscopy (TEM) image was obtained by JEOL JEM-2000 EX transmission electron microscope (JEOL, Tokyo, Japan). Fourier-transformed infrared spectroscopy (FTIR) characterization has been performed on Thermo Nicolet 380 spectrometer using KBr pellets (Nicolet, Wisconsin, USA). Elemental analyses were performed on Vario EL III (Elementar, Hanau, Germany). The saturation magnetization curve was carried out at room temperature on the Physical Property Measurement System 9T (Quantum Design, San Diego, USA).

### Preparation of standard protein digests

Standard glycoprotein (human IgG, HRP, AGP, 1 mg, respectively) was dissolved in denaturing buffer containing 8 M urea and 100 mM Tris-HCl buffer (pH 8.2), 10 mM dithiothreitol, and heated at 60 °C for 60 min. The sample was alkylated by the addition of iodoacetamide to a concentration of 20 mM and incubated at room temperature in the dark for 40 min. After being diluted ten-fold with 100 mM Tris-HCl buffer (pH 8.2), the solution was subsequently treated with trypsin at 37°C (enzyme/protein ratio of 1:40, w/w) for 18 h. Digestion was stopped with FA to a

final concentration of 0.5 %, and all of the obtained protein tryptic digests were stored in  $-20\text{ }^{\circ}\text{C}$ . Other three enzymes for human AGP digest procedure are similar to tryptic digest.

### **SDA-PAGE and tryptic in-gel digestion**

The human plasma sample from healthy donor was thawed at  $4\text{ }^{\circ}\text{C}$  and ultrafiltrated through a membrane with MWCO of 3 kDa at 14000 g for 30 min. The collected proteins on the membrane were washed with 500  $\mu\text{L}$  10 mM ammonium bicarbonate (pH 7.5) for three times and dissolved in 500  $\mu\text{L}$  10 mM ammonium bicarbonate (pH 7.5). Then, protein from human plasma were separated by SDS-PAGE (12 %) and stained with coomassie brilliant blue. Protein gel pieces were cut into five parts : I (0-24 KDa), II (24- 28 KDa), III(28- 52 KDa), IV(52- 95 KDa), and V (95- KDa) and placed in five microcentrifuge tubes, washed with pure water, 50 mM  $\text{NH}_4\text{HCO}_3/\text{ACN}$  (1:1, v/v), and ACN before stripe lucency, respectively. 100  $\mu\text{L}$  ACN was added and incubated for 10 min followed by discard the supernatants, then dried under reduced pressure for 10 min. 1.0 mL of 10 mM DTT (in 50 mM  $\text{NH}_4\text{HCO}_3$ , pH 8.0) was added, incubated for 60 min at  $56\text{ }^{\circ}\text{C}$ . The supernatant was removed and 1 mL of freshly prepared 55 mM iodoacetamide in 50 mM  $\text{NH}_4\text{HCO}_3$  (pH 8.0) was added and incubated in the dark for 45 min. The supernatant was discarded and 1.5 mL ACN was added. The supernatant was discarded and dried under reduced pressure for 10 min. The gel pieces were rehydrated in 25 mM  $\text{NH}_4\text{HCO}_3$  (pH 8.0) (just enough to cover the gel-pieces) containing 10 ng/ $\mu\text{L}$  trypsin and centrifugation for 30 min at  $4\text{ }^{\circ}\text{C}$ . The supernatant was removed and 20  $\mu\text{L}$  25 mM  $\text{NH}_4\text{HCO}_3$  (pH 8.0) was added. The tryptic digestion was carried out at  $37\text{ }^{\circ}\text{C}$  for 18 h and stopped by added 1% FA.

After the tryptic digestion was removed and transferred to a new microcentrifuge tube.  $\text{ACN}/\text{H}_2\text{O}/\text{TFA}$  (60:39.9:0.1,v/v/v) was added to cover the gel-pieces and incubated for 15 min, then the same volume of ACN was added and incubated for 15 min. After centrifugation, the supernatant was collected and repeated two times. The gel pieces were rehydrated in 25 mM  $\text{NH}_4\text{HCO}_3$  (pH 8.0) and incubated for 15 min, then the same volume of ACN was added and incubated for 15 min. After centrifugation, the supernatant was collected and repeated two times. The collected supernatants were then lyophilized in speed-vac and stored at  $-20\text{ }^{\circ}\text{C}$ .

### **Enrichment of N-linked glycopeptides with hybrid $\text{Fe}_3\text{O}_4@\text{SiO}_2@\text{PEG}$ -Maltose MNPs**

As shown in **Scheme S1**, First, 5  $\mu\text{L}$  MNPs (4.0 mg/mL) was first washed and dispersed in ACN/H<sub>2</sub>O/TFA (88: 11.9: 0.1, v/v/v), 100  $\mu\text{L}$ ). Then glycoprotein digests were dissolved in ACN/H<sub>2</sub>O/TFA (88: 11.9: 0.1, v/v/v), 100  $\mu\text{L}$ ) and added to the suspension in a microcentrifuge tube. The capture procedure was carried out under gentle agitation at room temperature for 10 min. After reaction, the supernatant was discarded by separation with a magnet. Wash three times with ACN/H<sub>2</sub>O/TFA (88: 11.9: 0.1, v/v/v, 60  $\mu\text{L}$ ) to remove the non-glycopeptides. Human IgG, and HRP glycopeptides were eluted with 2 $\times$  10  $\mu\text{L}$  H<sub>2</sub>O/TFA (99.9: 0.1, v/v), ACN/H<sub>2</sub>O/TFA (30: 69.9: 0.1, v/v/v), and H<sub>2</sub>O/TFA (99.9: 0.1, v/v), respectively. The elution buffer was added to release the glycopeptides at room temperature for 10 min. The collected peptides were analysed by MALDI-TOF MS.

### **Deglycosylation of N-linked glycopeptides by PNGase F**

Each N-linked glycopeptides fraction collected from the enrichment was redissolved in 30  $\mu\text{L}$  50 mM NH<sub>4</sub>HCO<sub>3</sub> (pH 7.5), 10 U of PNGaseF was added to the solution, and incubated overnight at 37 °C for N-glycan release. The reaction was stopped by heating to 100 °C for 10 min, and then directly spotted on the MALDI target plate or analysed by nano-LC-MS/MS.

### **Mass spectrometry**

All MALDI-TOF mass spectrometric experiments were carried out on a BRUKER Autoflex time-of-flight mass spectrometer (Bruker Daltonics Autoflex, Germany) equipped with a delayed ion-extraction device and a pulsed nitrogen laser (UV, 337 nm). The MALDI-TOF mass spectrometer used a ground-steel sample target with 384 spots. The range of laser energy was adjusted to slightly above the threshold for obtaining the good resolution and signal-to-noise ratio. All measurements were carried out in linear positive-ion mode with delayed ion extraction. The delay time for ion extraction and the extraction voltage were set at 90 ns and 20 kV, respectively. Each TOF-MS spectrum was acquired by the accumulation of 50 laser shots. 2,5-dihydroxy-benzoic acid (DHB) (12.5 mg/mL, in 50% ACN/H<sub>2</sub>O solution) was used as the matrix for the analysis of N-linked glycopeptides by MALDI-TOF MS. Sample aliquots (0.5  $\mu\text{L}$ ) were placed on MALDI plate and dried at room temperature. After adding DHB matrix (0.5  $\mu\text{L}$ ), the sample spots were dried under vacuum prior to TOF-MS analysis.

All nano-LC-MS analyses were performed on a Thermo LTQ-Orbitrap Velos mass spectrometer with a nanospray ion source and a Surveyor HPLC system

(Thermo, San Jose, CA, USA). Lyophilized enriched glycopeptides were redissolved in H<sub>2</sub>O/FA (99.9:0.1, v/v), and injected onto the trap-column with a flow of 100 nL/min. After a valve switch, the trap column was connected to reverse-phase analytical column (120 mm × 75 μm i.d.) packed with C<sub>18</sub> particles (3 μm, 120 Å). For RPLC separation, H<sub>2</sub>O/FA (99.9:0.1, v/v) was used as the mobile phase A, and ACN/FA (99.9:0.1, v/v) was used as the mobile phase B. About 30 μg re-dissolved peptides was loaded onto a C<sub>18</sub> capillary column as sample loop and separated on the capillary column with a linear gradient where the mobile phase B was programmed from 5 to 35% in 120 min. The flow rate was set at 200 nL/min. The LTQ-Orbitrap mass spectrometer (Thermo, San Jose, CA) was operated in data-dependent MS/MS acquisition mode. Full mass scan was acquired from *m/z* 300 to 2000 (R= 60000 at *m/z* 400). The 20 most intense ions with charge state ≥ 2 and above an intensity threshold of 300 from the full scan were selected to fragmentation in the LTQ. The dynamic exclusion function was set as follows: repeat count 1, repeat duration 30 s, and exclusion duration of 90 s.

#### **Database search and data analysis**

The acquired MS/MS spectra were searched against the International Protein Index (IPI) human protein database (version 3.80) using MASCOT software (version 2.3). The search criteria were set as follows: variable modifications of methionine oxidation (+16 Da) and N-terminal acetylation, deamidation (N). and fixed modification of cysteine residues (+57 Da), at most two missed tryptic cleavage sites, 10 ppm error tolerance in MS and 0.8 Da error tolerance in MS/MS. The resulting data files were exported with the filtrations of significance threshold  $p < 0.01$  and ion score  $\geq 25$ . Since N-glycosylation occurs at a consensus N-X-S/T(X≠P) sequon, the remaining peptide sequences were additionally filtered to remove non-motif containing peptides.

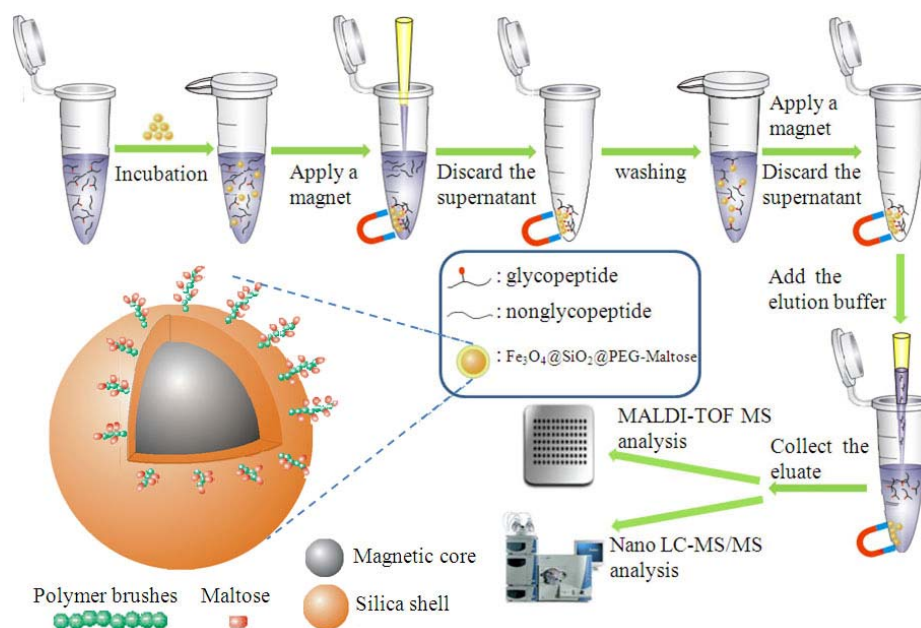

**Scheme S1** The application of hybrid  $\text{Fe}_3\text{O}_4@SiO_2@PEG\text{-Maltose}$  MNPs for the enrichment of glycopeptides with the help of an external magnet field.

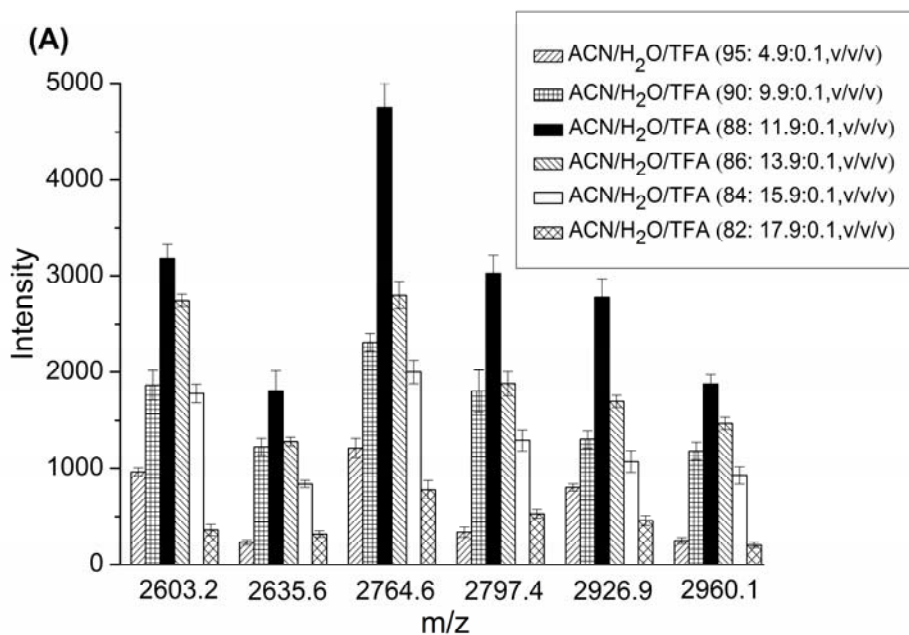

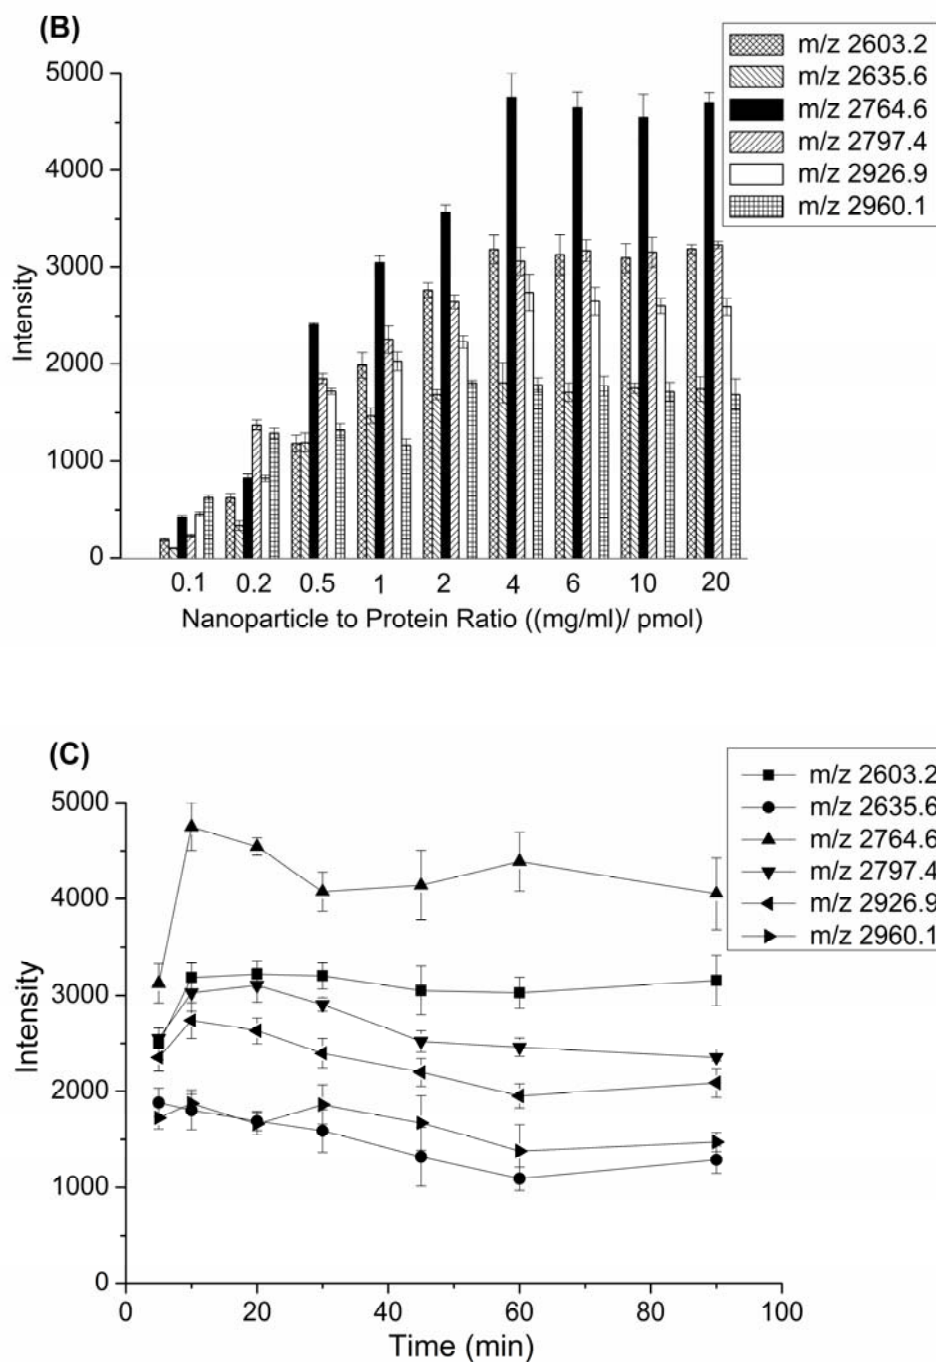

**Fig. S1** The effect of A) acetonitrile concentration, B) the ratio of nanoparticle-to-protein ([mg/mL]/pmol) and C) incubation time influencing intensity on peaks of six chosen glycopeptides captured by Fe<sub>3</sub>O<sub>4</sub>@SiO<sub>2</sub>@PEG-Maltose MNPs from tryptic digest of human IgG (0.5  $\mu$ L, 5 pmol).



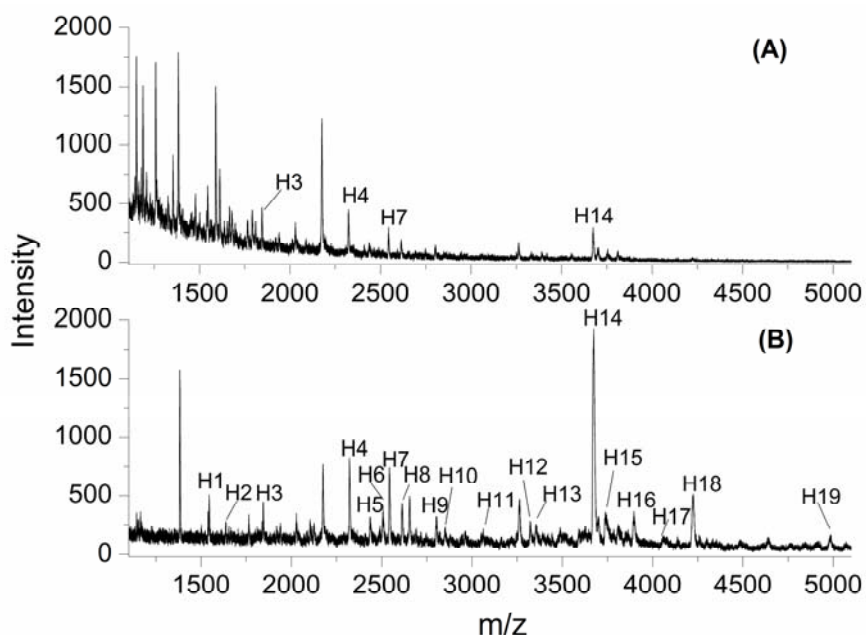

**Fig. S2** MALDI-TOF MS spectra of A) direct analysis of 3 pmol tryptic digest of HRP (0.5  $\mu$ L) and (B) after enrichment with  $\text{Fe}_3\text{O}_4@SiO_2@PEG$ -Maltose MNPs.

**Alpha-1-acid glycoprotein:**

MALSWVLTVLSLLPLLEAQIPLCANLVPVPITN#ATLDOITGKWFYIASAFRNEEY  
N#KSVQEIQATFFYFTPN#KTEDTIFLREYQTRODOCIYN#TTYLNVOREN#GTISRY  
VGGQEHFAHLLILRDTKTYMLAFDVNDEKNWGLSVYADKPETTKEQLGEFY  
EALDCLRIPKSDVVYTDWKKDKCEPLEKQHEKERKQEEGES

**Alpha-2-acid glycoprotein:**

MALSWVLTVLSLLPLLEAQIPLCANLVPVPITN#ATLDRITGKWFYIASAFRNEEY  
N#KSVQEIQATFFYFTPN#KTEDTIFLREYQTRONOCFYN#SSYLNVOREN#GTVSR  
YEGGREHVAHLLFLRDTKTLMFGSYLDDEKNWGLSFYADKPPTTKEQLGEFYE  
ALDCLCIPRSDVMYTDWKKDKCEPLEKQHEKERKQEEGES

**Fig. S3** N-glycosites of human AGP identified by trypsin (in red), by chylmotrypsin (in gray), by elastase (in italic), and by Gluc (underlined with black line). N# denotes the N-linked glycosylation site.

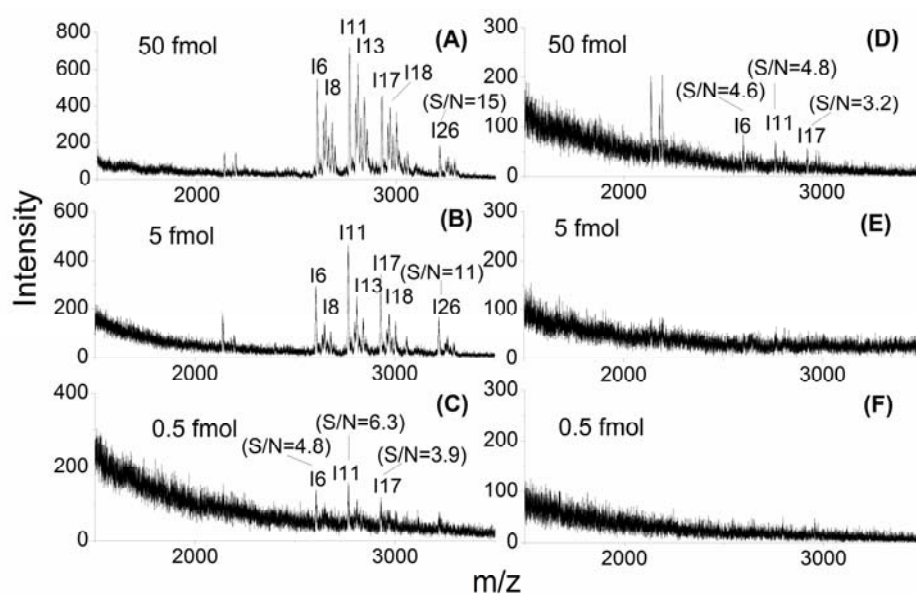

**Fig. S4.** Comparison of MALDI-TOF MS spectra of human IgG digest of (A) 50 fmol (0.5  $\mu$ L), (B) 5 fmol (0.5  $\mu$ L), (C) 0.5 fmol (0.5  $\mu$ L), treated by Fe<sub>3</sub>O<sub>4</sub>@SiO<sub>2</sub>@PEG-Maltose MNPs, and (D) 50 fmol (0.5  $\mu$ L), (E) 5 fmol (0.5  $\mu$ L), (F) 0.5 fmol (0.5  $\mu$ L), treated by silica-based click Maltose, respectively.

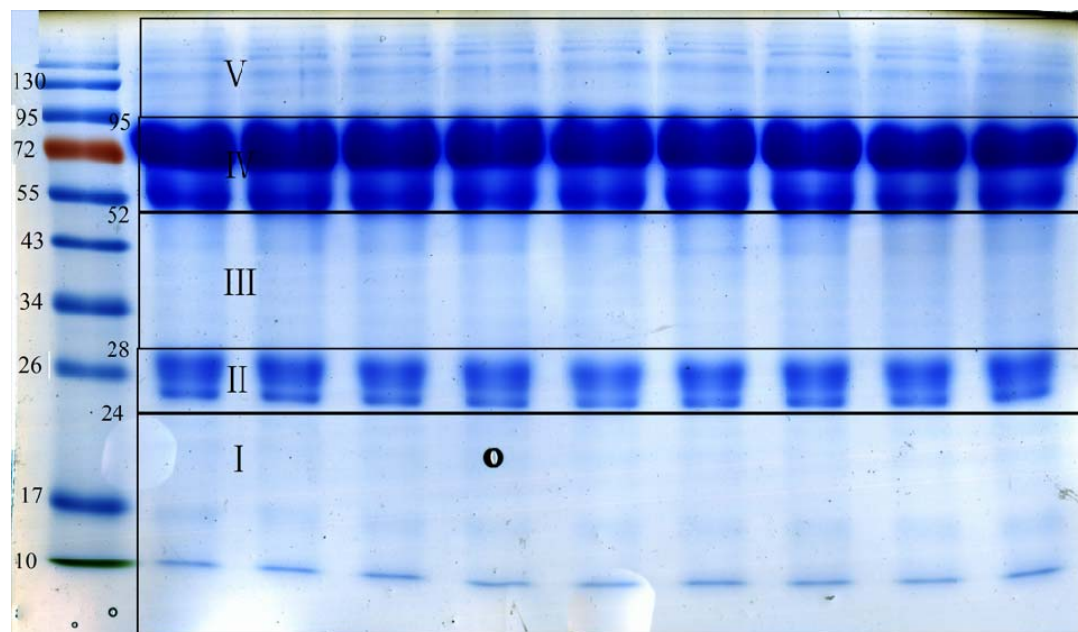

**Fig. S5** Analysis of human plasma by SDS-PAGE. (Protein gel pieces were cut into five parts : I (0- 24 KDa), II (24- 28 KDa), III(28- 52 KDa), IV(52- 95 KDa), and V(95- KDa))

**Table S1.** Molecular masses and proposed oligosaccharide composition of the glycopeptides from human IgG after enrichment. N# denotes the N-linked glycosylation site.

| Peak number | Observed $m/z$ | Glycan composition            | Amino acid sequence |
|-------------|----------------|-------------------------------|---------------------|
| I1          | 2400.1         | [Hex]3[HexNAc]3[Fuc]1         | EEQFN#STFR          |
| I2          | 2432.0         | [Hex]3[HexNAc]3[Fuc]1         | EEQYN#STYR          |
| I3          | 2456.1         | [Hex]3[HexNAc]4               | EEQFN#STFR          |
| I4          | 2488.1         | [Hex]3[HexNAc]4               | EEQYN#STYR          |
| I5          | 2561.5         | [Hex]4[HexNAc]3[Fuc]1         | EEQFN#STFR          |
| I6          | 2603.2         | [Hex]3[HexNAc]4[Fuc]1         | EEQFN#STFR          |
| I7          | 2618.1         | [Hex]4[HexNAc]4               | EEQFN#STFR          |
| I8          | 2635.6         | [Hex]3[HexNAc]4[Fuc]1         | EEQYN#STYR          |
| I9          | 2674.4         | [Hex]3[HexNAc]5               | EEQFN#STYR          |
| I10         | 2691.0         | [Hex]3[HexNAc]5               | EEQYN#STYR          |
| I11         | 2764.6         | [Hex]4[HexNAc]4[Fuc]1         | EEQFN#STFR          |
| I12         | 2780.1         | [Hex]5[HexNAc]4               | EEQFN#STFR          |
| I13         | 2797.4         | [Hex]4[HexNAc]4[Fuc]1         | EEQYN#STYR          |
| I14         | 2821.3         | [Hex]4[HexNAc]5               | EEQFN#STFR          |
| I15         | 2838.1         | [Hex]3[HexNAc]5[Fuc]1         | EEQYN#STYR          |
| I16         | 2853.3         | [Hex]4[HexNAc]5               | EEQYN#STYR          |
| I17         | 2926.9         | [Hex]5[HexNAc]4[Fuc]1         | EEQFN#STFR          |
| I18         | 2960.1         | [Hex]5[HexNAc]4[Fuc]1         | EEQYN#STYR          |
| I19         | 2968.6         | [Hex]4[HexNAc]5[Fuc]1         | EEQFN#STFR          |
| I20         | 2983.2         | [Hex]5[HexNAc]5               | EEQFN#STFR          |
| I21         | 3000.6         | [Hex]4[HexNAc]5[Fuc]1         | EEQYN#STYR          |
| I22         | 3015.1         | [Hex]5[HexNAc]5               | EEQYN#STYR          |
| I23         | 3057.1         | [Hex]4[HexNAc]4[Fuc]1[NeuAc]1 | EEQFN#STFR          |
| I24         | 3129.4         | [Hex]5[HexNAc]5[Fuc]1         | EEQFN#STFR          |
| I25         | 3161.3         | [Hex]5[HexNAc]5[Fuc]1         | EEQYN#STYR          |
| I26         | 3219.1         | [Hex]5[HexNAc]4[Fuc]1[NeuAc]1 | EEQFN#STFR          |
| I27         | 3250.9         | [Hex]5[HexNAc]4[Fuc]1[NeuAc]1 | EEQYN#STYR          |

**Table S2.** Molecular masses and proposed oligosaccharide composition of the glycopeptides from HRP after enrichment. N# denotes the N-linked glycosylation site

| Peak number | Observed $m/z$ | Glycan composition          | Amino acid sequence |
|-------------|----------------|-----------------------------|---------------------|
| H1          | 1547.2         | [Hex]2[HexNAc]1             | PN#ATDTIPLVR        |
| H2          | 1636.3         | [Hex]2[HexNAc]1             | SPN#ATDTIPLVR       |
| H3          | 1844.1         | [Hex]3[HexNAc]2[Fuc]1[Xyl]1 | SPN#ATDTIPLVR       |
| H4          | 2321.5         | [Hex]2[HexNAc]2             | MGN#ITPLTGTGQQIR    |
| H5          | 2438.2         | [Hex]3[HexNAc]2[Fuc]1[Xyl]1 | SILLDN#TTSFR        |

|     |        |                                                            |                                                       |
|-----|--------|------------------------------------------------------------|-------------------------------------------------------|
| H6  | 2509.0 | [Hex]3[HexNAc]2[Fuc]1[Xyl]1                                | ASILLDN#TTSFR                                         |
| H7  | 2543.2 | [Hex]3[HexNAc]2[Fuc]1[Xyl]1                                | SSPN#ATDTIPLVR                                        |
| H8  | 2612.6 | [Hex]3[HexNAc]2[Xyl]1                                      | MGN#ITPLTGTQGQIR                                      |
| H9  | 2802.4 | [Hex]3[HexNAc]2[Fuc]1[Xyl]1                                | LFSSPN#ATDTIPLVR                                      |
| H10 | 2850.8 | [HexNAc]1[Fuc]1                                            | GLIQSDQELFSSPN#ATDTIPLVR                              |
| H11 | 3061.3 | [Hex]3[HexNAc]2[Fuc]1[Xyl]1                                | QSDQELFSSPN#ATDTIPLVR                                 |
| H12 | 3323.1 | [Hex]3[HexNAc]2[Fuc]1[Xyl]1                                | QLTPTFYDN SCPN#VSNIVR                                 |
| H13 | 3355.2 | [Hex]2[HexNAc]2[Fuc]1[Xyl]1                                | SFAN#STQTFNFVAMDR                                     |
| H14 | 3674.0 | [Hex]3[HexNAc]2[Fuc]1[Xyl]1                                | GLIQSDQELFSSPN#ATDTIPLVR                              |
| H15 | 3750.5 | [Hex]3[HexNAc]2[Xyl]1                                      | LHFHDCFVNGCDASILLDN#TTSFR                             |
| H16 | 3896.1 | [Hex]3[HexNAc]2[Fuc]1[Xyl]1                                | LHFHDCFVNGCDASILLDN#TTSFR                             |
| H17 | 4059.0 | [Hex]3[HexNAc]2[Xyl]1                                      | QLTPTFYDN SC(AAVESACPR)PN#V<br>SNIVR-H <sub>2</sub> O |
| H18 | 4223.9 | [Hex]3[HexNAc]2[Fuc]1[Xyl]1                                | QLTPTFYDN SC(AAVESACPR)PN#V<br>SNIVR                  |
| H19 | 4986.2 | [Hex]2[HexNAc]2[Fuc]1[Xyl]1<br>[Hex]2[HexNAc]2[Fuc]1[Xyl]1 | LYN#FSNTGLPDPTLN#TTYLQTLR                             |

**Table S3.** List of identified glycoproteins from 15  $\mu$ L human plasma captured by hybrid Fe<sub>3</sub>O<sub>4</sub>@SiO<sub>2</sub>@PEG-Maltose MNPs, N# denotes the N-linked glycosylation site.

| No | Protein     | Description                              | Peptide sequence                                                                                 |
|----|-------------|------------------------------------------|--------------------------------------------------------------------------------------------------|
| 1  | IPI00792863 | EDEM1 5 kDa protein                      | G <u>N</u> SSEFQKAVKLVIN <u>T</u> VSFDK                                                          |
| 2  | IPI00387110 | Ig kappa chain V-II<br>region MIL        | FSGSGSGT <u>N</u> FTLK                                                                           |
| 3  | IPI00019399 | SAA4 Serum amyloid<br>A-4 protein        | VYLQGLIDCYLFG <u>N</u> SSTVLEDSK                                                                 |
| 4  | IPI00022731 | APOC4 Apolipoprotein<br>C-IV             | ELLETVV <u>N</u> R                                                                               |
| 5  | IPI00178926 | IGJ Immunoglobulin J<br>chain            | EN <u>I</u> SDPTSPLR<br>IIVPLNNRE <u>N</u> ISDPTSPLR                                             |
| 6  | IPI00013179 | PTGDS<br>Prostaglandin-H2<br>D-isomerase | WFSAGLAS <u>N</u> SSWLR<br>SVVAPATDGG <u>L</u> NLTSTFLR                                          |
| 7  | IPI00006662 | APOD Apolipoprotein<br>D                 | CIQAN <u>Y</u> SLMENGK<br>ADGTVNQIEGEATPV <u>N</u> LTEPAK<br>ADGTVNQIEGEATPV <u>N</u> LTEPAKLEVK |
| 8  | IPI00030739 | APOM Apolipoprotein<br>M                 | TELFSSSCP <u>G</u> GIML <u>N</u> ETGQGYQR                                                        |
| 9  | IPI00022429 | ORM1 Alpha-1-acid<br>glycoprotein 1      | EN <u>G</u> TISR<br>NEEY <u>N</u> K<br>QDQCIY <u>N</u> TTYLVNQR                                  |
| 10 | IPI00020091 | ORM2 Alpha-1-acid                        | QNQCFY <u>N</u> SSYLVNQR                                                                         |

---

|    |             |                                                                       |                                                                                                                                   |
|----|-------------|-----------------------------------------------------------------------|-----------------------------------------------------------------------------------------------------------------------------------|
|    |             | glycoprotein 2                                                        | SVQEIQATFFYFTP <u>N</u> KTEDTIFLR                                                                                                 |
| 11 | IPI00022391 | APCS Serum amyloid<br>P-component                                     | ESVTDHVNLTIPLEKPLQ <u>N</u> FTLCFR                                                                                                |
| 12 | IPI00022392 | C1QA Complement<br>C1q subcomponent<br>subunit A                      | NPPMGGNVVIFDTVITNQEEP <u>YQ</u> NHSGR<br>RNPPMGGNVVIFDTVITNQEEP <u>YQ</u> NHSGR<br>RNPPMGGNVVIFDTVITNQEEP <u>YQ</u> NHSG          |
| 13 | IPI00025862 | C4BPB Isoform 1 of<br>C4b-binding protein<br>beta chain               | LGHCPDPVLVNGEFSSSGPV <u>N</u> VSDK<br>EWD <u>N</u> TTTECR                                                                         |
| 14 | IPI00006154 | CFHR2 Isoform Long<br>of Complement factor<br>H-related protein 2     | LQNNEN <u>N</u> ISCVER                                                                                                            |
| 15 | IPI00431645 | HP HP protein                                                         | MVSHH <u>N</u> LTGATLINEQWLLTTAK                                                                                                  |
| 16 | IPI00018305 | IGFBP3 Insulin-like<br>growth factor-binding<br>protein 3             | AYLLPAPPAG <u>N</u> ASESEEDR<br>GLCV <u>N</u> ASAVSR                                                                              |
| 17 | IPI00293925 | FCN3 Isoform 1 of<br>Ficolin-3                                        | VELEDFNG <u>N</u> R                                                                                                               |
| 18 | IPI00166729 | AZGP1<br>Zinc-alpha-2-glycoprote<br>in                                | DIVEYYNDS <u>N</u> NGSHVLQGR<br>FGCEIEN <u>N</u> R                                                                                |
| 19 | IPI00022417 | LRG1 Leucine-rich<br>alpha-2-glycoprotein                             | LPPGLLAN <u>F</u> TLLR<br>AGLQAFFQVQEC <u>N</u> K<br>MFSQ <u>N</u> DTR                                                            |
| 20 | IPI00027507 | CFHR3 Complement<br>factor H-related protein<br>3                     | FVQGN <u>S</u> TEVACHPGYGLPK                                                                                                      |
| 21 | IPI00020986 | LUM Lumican                                                           | LGSFEGLVN <u>L</u> TFIHLQHNR<br>AFEN <u>V</u> TDLQWLILDHNLLENSK                                                                   |
| 22 | IPI00477597 | HPR Isoform 1 of<br>Haptoglobin-related<br>protein                    | NLFL <u>N</u> HSENATAK                                                                                                            |
| 23 | IPI00298828 | APOH<br>Beta-2-glycoprotein 1                                         | DTAVFECLPQHAF <u>G</u> NDTITCTTHG <u>N</u> WTK<br>VYKPSAG <u>N</u> NSLYR<br>LG <u>N</u> WSAMPSCK<br>PSAG <u>N</u> NSLYR           |
| 24 | IPI00218732 | PON1 Serum<br>paraoxonase/arylesteras<br>e 1                          | HAN <u>W</u> TLTPLK<br>VTQVYAEN <u>G</u> TVLQGSTVASVYK<br>VVAEGFDFANGIN <u>I</u> SPDGK<br>SLDFNTLVD <u>N</u> ISVDPETGDLVWGCHPNGMK |
| 25 | IPI00479708 | IGHM Full-length<br>cDNA clone<br>CS0DD006YL02 of<br>Neuroblastoma of | STGKPTLY <u>N</u> VSLVMSDTAGTCY                                                                                                   |

---

|    |             |                                                                                                            |                                                                                                   |
|----|-------------|------------------------------------------------------------------------------------------------------------|---------------------------------------------------------------------------------------------------|
|    |             | Homo sapiens                                                                                               |                                                                                                   |
| 26 | IPI00385264 | Ig mu heavy chain<br>disease protein                                                                       | THTNISESHPNATFSAVGEASICEDDWDSGER                                                                  |
| 27 | IPI00027482 | SERPINA6<br>Corticosteroid-binding<br>globulin                                                             | AQLLQGLGFNLTER<br>AVLQLNEEGVDTAGSTGVTLNLTSKPIILR                                                  |
| 28 | IPI00009030 | LAMP2 Isoform<br>LAMP-2A of<br>Lysosome-associated<br>membrane glycoprotein<br>2                           | IAVQFGPGFSWIANFTK                                                                                 |
| 29 | IPI00006114 | SERPINF1 Pigment<br>epithelium-derived<br>factor                                                           | VTQNLTLIEESLTSEFIHDIDR                                                                            |
| 30 | IPI00292946 | SERPINA7<br>Thyroxine-binding<br>globulin                                                                  | TLYETEVEFSTDFSNISAAK                                                                              |
| 31 | IPI00399007 | IGHG2 Putative<br>uncharacterized protein<br>DKFZp686I04196<br>(Fragment)                                  | NQVSLTCLVK                                                                                        |
| 32 | IPI00553177 | SERPINA1 Isoform 1<br>of Alpha-1-antitrypsin                                                               | YLGNNATAIFFLPDEGK<br>ADTHDEILEGLNFNLTETPEAQIHEGFQELLR<br>QLAHQSNSTNIFFSPVSIATAFAMLSLGTK           |
| 33 | IPI00641737 | HP Haptoglobin                                                                                             | VVLHPNYSQVDIGLIK                                                                                  |
| 34 | IPI00022431 | AHSG cDNA<br>FLJ55606, highly<br>similar to<br>Alpha-2-HS-glycoprotein                                     | VCQDCPLLAPLNDTR<br>AALAAFNAQNNGSNFQLEEISR                                                         |
| 35 | IPI00328609 | SERPINA4 Kallistatin                                                                                       | SQILEGLGFNLTELSESDVHR                                                                             |
| 36 | IPI00215894 | KNG1 Isoform LMW<br>of Kininogen-1                                                                         | ITYSIVQTNCSK                                                                                      |
| 37 | IPI00550991 | SERPINA3 cDNA<br>FLJ35730 fis, clone<br>TESTI2003131, highly<br>similar to<br>ALPHA-1-ANTICHY<br>MOTRYPSIN | YTGNASALFILPDQDK<br>FNLTTETSEAEIHQSFQHLLR<br>NVIFSPLSISTALAFSLGAHNNTLTELK<br>TLNQSSDELQLSMGNAMFVK |
| 38 | IPI00785084 | IGHG1;IGHV4-31;LO<br>C100290146 IGH@<br>protein                                                            | EEQYNSTYR                                                                                         |
| 39 | IPI00426051 | IGHG2 Putative<br>uncharacterized protein                                                                  | EEQFNSTFR                                                                                         |

|    |             |                                                                                                                       |                                                                                                                                                                                                                    |
|----|-------------|-----------------------------------------------------------------------------------------------------------------------|--------------------------------------------------------------------------------------------------------------------------------------------------------------------------------------------------------------------|
|    |             | DKFZp686C15213                                                                                                        |                                                                                                                                                                                                                    |
| 40 | IPI00896380 | IGHM Isoform 2 of Ig<br>mu chain C region                                                                             | <u>N</u> NSDISSTR<br>YK <u>N</u> NSDISSTR<br>THT <u>N</u> ISESHP <u>N</u> ATFSAVGEASICEDDWNNGER<br>GLTFQ <u>N</u> ASSMCVDPQDTAIR                                                                                   |
| 41 | IPI00022488 | HPX Hemopexin                                                                                                         | SWPAVG <u>N</u> CSSALR<br>CSDGWSFDATTLDD <u>N</u> GTMLFFK<br>ALPQP <u>N</u> VTSLLGCTH<br><u>N</u> GTGHG <u>N</u> STHHGPEYMR<br>GHGHR <u>N</u> GTGHG <u>N</u> STHHGPEYMR                                            |
| 42 | IPI00032179 | SERPINC1<br>Antithrombin-III                                                                                          | WVSN <u>K</u><br>LGAC <u>N</u> DTLQQLMEVFK<br>SLTF <u>N</u> ETYQDISELVYGAK                                                                                                                                         |
| 43 | IPI00291262 | CLU Isoform 1 of<br>Clusterin                                                                                         | ML <u>N</u> TSSLLEQLNEQFNWVSR<br>ELPGVC <u>N</u> ETMMALWEECKPCLK<br>ML <u>N</u> TSSLLEQLNEQFNWVS<br>KKEDAL <u>N</u> ETR<br>H <u>N</u> STGCLR<br>EDAL <u>N</u> ETR<br>KEDAL <u>N</u> ETR<br>LAN <u>L</u> TQGEDQYYLR |
| 44 | IPI00930442 | IGHG4 Putative<br>uncharacterized protein<br>DKFZp686M24218                                                           | EEQF <u>N</u> STYR<br>EEQF <u>N</u> STY                                                                                                                                                                            |
| 45 | IPI00784758 | LOC100126583;IGHA2<br>Putative<br>uncharacterized protein<br>DKFZp686M08189                                           | TPLTAN <u>I</u> TK                                                                                                                                                                                                 |
| 46 | IPI00032220 | AGT Angiotensinogen                                                                                                   | VYIHPFHLVIH <u>N</u> ESTCEQLAK                                                                                                                                                                                     |
| 47 | IPI00386879 | IGHA1 cDNA<br>FLJ14473 fis, clone<br>MAMMA1001080,<br>highly similar to Homo<br>sapiens SNC73 protein<br>(SNC73) mRNA | LAGKPTHV <u>N</u> VSVVMAEVDGTCY                                                                                                                                                                                    |
| 48 | IPI00009793 | C1RL Complement C1r<br>subcomponent-like<br>protein                                                                   | PVTPIAQ <u>N</u> QTTLGSSR                                                                                                                                                                                          |
| 49 | IPI00383164 | IGHA1 SNC66 protein                                                                                                   | LSLHRPALEDLLLGSEAN <u>L</u> TCTLTGLR                                                                                                                                                                               |
| 50 | IPI00642017 | LOC100126583;IGHA2<br>Putative<br>uncharacterized protein<br>DKFZp686C02218<br>(Fragment)                             | PALEDLLLGSEAN <u>L</u> TCTLTGLR                                                                                                                                                                                    |

---

|    |             |                                                                                           |                                                                                                                     |
|----|-------------|-------------------------------------------------------------------------------------------|---------------------------------------------------------------------------------------------------------------------|
| 51 | IPI00894384 | LOC100126583;IGHA2<br>Putative<br>uncharacterized protein<br>DKFZp686O16217<br>(Fragment) | HYT <u>N</u> SSQDVTVPCR<br>PALEDLLLGSEAN <u>L</u> TCTLTGL                                                           |
| 52 | IPI00298971 | VTN Vitronectin                                                                           | <u>N</u> NATVHEQVGGPSLTSDLQAQSK<br><u>N</u> ISDGFDFGIPDNVDAALALPAHSYSGR                                             |
| 53 | IPI00291866 | SERPING1 Plasma<br>protease C1 inhibitor                                                  | VGQLQLSH <u>N</u> LSLVILVPQNLK<br>DTFV <u>N</u> ASR<br>VLS <u>N</u> NSDANLELINTWVAK                                 |
| 54 | IPI00384280 | PCYOX1<br>Prenylcysteine oxidase<br>1                                                     | LLHALGGDDFLGML <u>N</u> R                                                                                           |
| 55 | IPI00418153 | IGHM Putative<br>uncharacterized protein<br>DKFZp686I15212                                | EEQY <u>N</u> STFR                                                                                                  |
| 56 | IPI00009865 | KRT10 Keratin, type I<br>cytoskeletal 10                                                  | TIDDLKNQIL <u>N</u> LTTDNANILLQIDNAR<br><u>N</u> VSTGDVNVEMNAAPGVDLTQLLN <u>N</u> MR                                |
| 57 | IPI00292950 | SERPIND1 Serpin<br>peptidase inhibitor,<br>clade D (Heparin<br>cofactor), member 1        | <u>N</u> LSMPLLPADFHK<br>DFV <u>N</u> ASSK                                                                          |
| 58 | IPI00022371 | HRG Histidine-rich<br>glycoprotein                                                        | VIDF <u>N</u> CTTSSVSSALANTK                                                                                        |
| 59 | IPI00479116 | CPN2<br>Carboxypeptidase N<br>subunit 2                                                   | LYLGS <u>N</u> LTAHPALFQ <u>N</u> LSK<br>LEDLEVTGSSFL <u>N</u> LSTNIFS <u>N</u> LTSLGK                              |
| 60 | IPI00218413 | BTD Biotinidase                                                                           | NPVGLIGA <u>E</u> NATGETDPSSHK<br>DVQIIVFPEDGIHGF <u>N</u> FTR<br>WNVNAPPTFHSEMMYD <u>N</u> F <sup>1</sup> TLVPVWGK |
| 61 | IPI00019359 | KRT9 Keratin, type I<br>cytoskeletal 9                                                    | <u>N</u> YSPY <u>N</u> TIDDLKDQIVDLTVGNK                                                                            |
| 62 | IPI00163207 | PGLYRP2 Isoform 1 of<br>N-acetylmuramoyl-L-al<br>anine amidase                            | GFGVAIVG <u>N</u> YTAALPTEAALR<br>LEPVHLQLQCMSQEQLAQVA <u>N</u> ATK                                                 |
| 63 | IPI00022395 | C9 Complement<br>component C9                                                             | AV <u>N</u> ITSENLIDDVVSLIR                                                                                         |
| 64 | IPI00021304 | KRT2 Keratin, type II<br>cytoskeletal 2 epidermal                                         | FGFGGPGGVGGGLGGPGGFGPGGYPGGIHEVSV <u>N</u><br>QSLQLPLNVK<br>MSGDLSS <u>N</u> VTVSVTSSTISSNVASK                      |
| 65 | IPI00023673 | LGALS3BP<br>Galectin-3-binding<br>protein                                                 | ALGF <u>E</u> NATQALGR<br>AAIPSALDT <u>N</u> SSK                                                                    |
| 66 | IPI00011252 | C8A Complement                                                                            | GGSSGWSGGLAQ <u>N</u> R                                                                                             |

---



---

|    |             |                                                                                        |                                                                                                                                             |
|----|-------------|----------------------------------------------------------------------------------------|---------------------------------------------------------------------------------------------------------------------------------------------|
|    |             | component C8 alpha<br>chain                                                            |                                                                                                                                             |
| 67 | IPI00043716 | LCORL Isoform 1 of<br>Ligand-dependent<br>nuclear receptor<br>corepressor-like protein | <u>N</u> SSKPV                                                                                                                              |
| 68 | IPI00291867 | CFI Complement factor<br>I                                                             | LIS <u>N</u> CSK<br>FLN <u>N</u> GTCTAEGK                                                                                                   |
| 69 | IPI00021727 | C4BPA C4b-binding<br>protein alpha chain                                               | FSLLGHASISCTVE <u>N</u> ETIGVWRPSPPTCEK                                                                                                     |
| 70 | IPI00019943 | AFM Afamin                                                                             | DIENF <u>N</u> STQK<br>YAEDKF <u>N</u> ETTEK                                                                                                |
| 71 | IPI00019568 | F2 Prothrombin<br>(Fragment)                                                           | GHV <u>N</u> ITR<br>YPHKPEIN <u>S</u> TTHPGADLQENFCR<br><u>N</u> FTENDLLVR<br>WVLTAAHCLLYPPWDK <u>N</u> FTENDLLVR                           |
| 72 | IPI00029193 | HGFAC Hepatocyte<br>growth factor activator                                            | DSVSVVLGQHFF <u>N</u> R                                                                                                                     |
| 73 | IPI00032328 | KNG1 Isoform HMW<br>of Kininogen-1                                                     | LNAEN <u>N</u> ATFYFK<br>YNSQ <u>N</u> QSNNQFVLYR                                                                                           |
| 74 | IPI00654888 | KLKB1 Plasma<br>kallikrein                                                             | GVN <u>F</u> NVSK<br>IVGGT <u>N</u> SSWGEWPQVSLQVK<br>IYSGIL <u>N</u> LSDITK<br>IYPGVDFGGEEL <u>N</u> VTFVK<br>LQAPL <u>N</u> YTEFQKPICLPSK |
| 75 | IPI00025864 | BCHE<br>Butyrylcholinesterase,<br>isoform CRA_b                                        | YGNP <u>N</u> ETQNN <u>S</u> TSWPVFK                                                                                                        |
| 76 | IPI00969516 | LOC100293534 similar<br>to complement<br>component 4B (Chido<br>blood group), partial  | GL <u>N</u> VTLSSTGR                                                                                                                        |
| 77 | IPI00017696 | C1S Complement C1s<br>subcomponent                                                     | NCGV <u>N</u> CSGDVFTALIGEIASPNYPKYPEN <u>S</u> R                                                                                           |
| 78 | IPI00022463 | TF Serotransferrin                                                                     | CGLVPVLAENY <u>N</u> K<br>QQQHFGS <u>N</u> VTDCSGNFCLFR                                                                                     |
| 79 | IPI00298860 | LTF cDNA FLJ78440,<br>highly similar to Human<br>lactoferrin                           | TAGWNVPIGTLRPFL <u>N</u> WTGPPEPIEAAVAR                                                                                                     |
| 80 | IPI00292218 | MST1 Hepatocyte<br>growth factor-like<br>protein                                       | GT <u>A</u> NTTTAGVPCQR                                                                                                                     |
| 81 | IPI00290283 | MASP1 Isoform 2 of<br>Mannan-binding lectin                                            | SGAV <u>N</u> SSAAR                                                                                                                         |

---

|    |             |                                                                                   |                                                                                                                                          |
|----|-------------|-----------------------------------------------------------------------------------|------------------------------------------------------------------------------------------------------------------------------------------|
|    |             | serine protease 1                                                                 |                                                                                                                                          |
| 82 | IPI00296165 | C1R cDNA FLJ54471,<br>highly similar to<br>Complement C1r<br>subcomponent         | EHEAQS <u>N</u> ASLDVFLGHTNVEELMK                                                                                                        |
| 83 | IPI00004573 | PIGR Polymeric<br>immunoglobulin<br>receptor                                      | LSLLEPG <u>N</u> GTFTVILNQLTSR                                                                                                           |
| 84 | IPI00299503 | GPLD1 Isoform 1 of<br>Phosphatidylinositol-gl<br>ycan-specific<br>phospholipase D | LNVEAA <u>N</u> WTVR<br>LGTSLSSGHVLM <u>N</u> GTLK                                                                                       |
| 85 | IPI00296608 | C7 Complement<br>component C7                                                     | <u>N</u> YTLTGR<br>INNDFN <u>Y</u> EFY <u>N</u> STWSYVK                                                                                  |
| 86 | IPI00028413 | ITIH3 Isoform 1 of<br>Inter-alpha-trypsin<br>inhibitor heavy chain<br>H3          | NAHGEEK <u>E</u> NLTAR                                                                                                                   |
| 87 | IPI00218192 | ITIH4 Isoform 2 of<br>Inter-alpha-trypsin<br>inhibitor heavy chain<br>H4          | AFIT <u>N</u> FSMIIDGMTYPGIK<br>LPTQ <u>N</u> ITFQTESSVAEQEAEFQSPK                                                                       |
| 88 | IPI00292530 | ITIH1<br>Inter-alpha-trypsin<br>inhibitor heavy chain<br>H1                       | A <u>N</u> LSSQALQMSLDYGFVTPLTSMIR<br>ICDLLVANNHFAHFFAPQ <u>N</u> LTNMNK<br>DKICDLLVANNHFAHFFAPQ <u>N</u> LTNMNK                         |
| 89 | IPI00305461 | ITIH2 Inter-alpha<br>(Globulin) inhibitor H2,<br>isoform CRA_a                    | GAFIS <u>N</u> FSMITVDGK                                                                                                                 |
| 90 | IPI00005031 | PCDH11X Isoform 7 of<br>Protocadherin-11<br>X-linked                              | YSIVGGNTRDLFAIDQETG <u>N</u> ITLMEK                                                                                                      |
| 91 | IPI00025753 | DSG1 Desmoglein-1                                                                 | TGE <u>I</u> NITSIVDR                                                                                                                    |
| 92 | IPI00017601 | CP Ceruloplasmin                                                                  | ELHHLQE <u>Q</u> NVSNAFLDK<br>E <u>N</u> LTA PGSDSAVFFEQGTTR<br>EHEGAIY <u>P</u> D <u>N</u> TTDFQR<br>DVDKEFYLFPTVFD <u>E</u> NESLLEDNIR |
| 93 | IPI00947496 | 124 kDa protein                                                                   | LGSYPVGG <u>N</u> VSFECEDGFILR                                                                                                           |
| 94 | IPI00297931 | SYNRG Isoform 1 of<br>Synergina gamma                                             | MPPWIY <u>N</u> ESLVPDAYK                                                                                                                |
| 95 | IPI00019591 | CFB cDNA FLJ55673,<br>highly similar to<br>Complement factor B                    | TMFP <u>N</u> LT DVR<br>IVLDPSGSMNIYLVLDGSDSIGAS <u>N</u> FTGAK                                                                          |
| 96 | IPI00029739 | CFH Isoform 1 of                                                                  | SPDV <u>I</u> NGSPISQK                                                                                                                   |

---

|     |             |                                                     |                                                                                                                                                                             |
|-----|-------------|-----------------------------------------------------|-----------------------------------------------------------------------------------------------------------------------------------------------------------------------------|
|     |             | Complement factor H                                 | IPCSQPPQIEHGTINSSR<br>MDGASNVTCINSR<br>ISEENETTCYMGK<br>WDPEVNC SMAQIQLC P P P P QIPNSH N M T T T L N Y R                                                                   |
| 97  | IPI00162735 | ATRN Isoform 2 of<br>Attractin                      | IDSTGNVTNELR                                                                                                                                                                |
| 98  | IPI00027235 | ATRN Isoform 1 of<br>Attractin                      | VFHIHNESWVLLTPK                                                                                                                                                             |
| 99  | IPI00478003 | A2M<br>Alpha-2-macroglobulin                        | GCVLLSYLNETVTVSASLESVR<br>SLGNVNFVTSAEALLESQELCGTEVPSVPEHGR<br>GNEANYYSNATTDEHGLVQFSINTTNVMGTSLTV<br>R                                                                      |
| 100 | IPI00783987 | C3 Complement C3<br>(Fragment)                      | TVLTPATNHMGNVTF TIPANR                                                                                                                                                      |
| 101 | IPI00418163 | C4B;C4A complement<br>component 4B<br>preproprotein | FSDGLESNSSTQFEVK                                                                                                                                                            |
| 102 | IPI00654875 | C4B Complement C4-B                                 | NLTVSVHVSPVEGLCLAGGGGLAQQVLVPAGSAR                                                                                                                                          |
| 103 | IPI00032258 | C4A Complement C4-A                                 | NTTCQDLQIEVTVK                                                                                                                                                              |
| 104 | IPI00022418 | FN1 Isoform 1 of<br>Fibronectin                     | LDAPTNLQFVNETDSTVLVR<br>DQCIVDDITYNVNDTFHK<br>LDAPTNLQFVNETDSTVLV                                                                                                           |
| 105 | IPI00217052 | NAV2 Isoform 1 of<br>Neuron navigator 2             | NRSQMIENIDACLNFLAAK                                                                                                                                                         |
| 106 | IPI00022229 | APOB Apolipoprotein<br>B-100                        | FEVDSPVY NATWSASLK<br>DFHSEYIVSASNFTSQLSSQVEQFLHR<br>FNSSYLQGTNQITGR<br>VNQNLVYESGSLNFSK<br>ELCTISHIFIPAMGNITYDFSFK<br>IQSPLFTLDANADIGNGTTSANEAGIAASITAK<br>FVEGSHNSTVSLTTK |

---
